# Supplementary material
Source: HighWire-hosted journal article supplement (https://jama.ama-assn.org/content/suppl/2003/03/25/289.9.1194)

# Pericarditis

La **pericarditis** se desarrolla cuando se inflama el tejido que rodea el corazón, llamado **pericardio** (se lesiona a causa de una infección o una irritación). El líquido que se forma a partir de dicha inflamación puede aumentar la presión ejercida sobre el corazón, por lo que lo comprime y dificulta su función de bombear la sangre que se distribuye por el cuerpo.

En el número de *JAMA* correspondiente al 5 de marzo de 2003 se incluye un artículo sobre pericarditis.

## CAUSAS DE PERICARDITIS

- Infecciones.
- Lesión a partir de un traumatismo o cirugía del tórax.
- Radioterapia en el área torácica.
- Uremia (acumulación de productos de descomposición de la sangre debida a una enfermedad del riñón).
- Artritis reumatoide o lupus (enfermedades relacionadas con una inflamación de la piel y de otros tejidos).
- Cáncer.
- Ataque al corazón (infarto de miocardio).

En ocasiones no puede determinarse una causa específica.

## SÍNTOMAS

- Dolor penetrante, agudo, en especial detrás del esternón, que se extiende hasta el cuello, hombro izquierdo y bordes musculares entre cuello y hombros.
- El dolor se intensifica cuando el individuo afectado respira profundamente.
- El dolor tiene tendencia a disminuir al sentarse.
- Dolor al tragar.
- Fiebre.

## DIAGNÓSTICO

Es muy importante que el médico establezca una historia clínica cuidadosa de los síntomas y lleve a cabo un examen físico. Con frecuencia, el electrocardiograma y otro examen del corazón denominado ecocardiografía proporcionan información útil.

## TRATAMIENTO

Con frecuencia, para tratar el dolor y la inflamación de la pericarditis son eficaces medicaciones como el ibuprofeno o la colchicina. Si la causa de esta enfermedad es una infección bacteriana, se administran antibióticos. Si el exceso de líquido en el pericardio afecta gravemente a la capacidad del corazón para bombear la sangre, en un procedimiento denominado **pericardiocentesis** puede insertarse una aguja o **catéter** (tubo) para extraer el líquido. En ocasiones, se requiere cirugía para aliviar la presión.

Según la causa subyacente, la pericarditis suele remitir en un mes o menos tiempo. No obstante, si se debe a una enfermedad como lupus o artritis reumatoide, puede persistir durante períodos más prolongados.

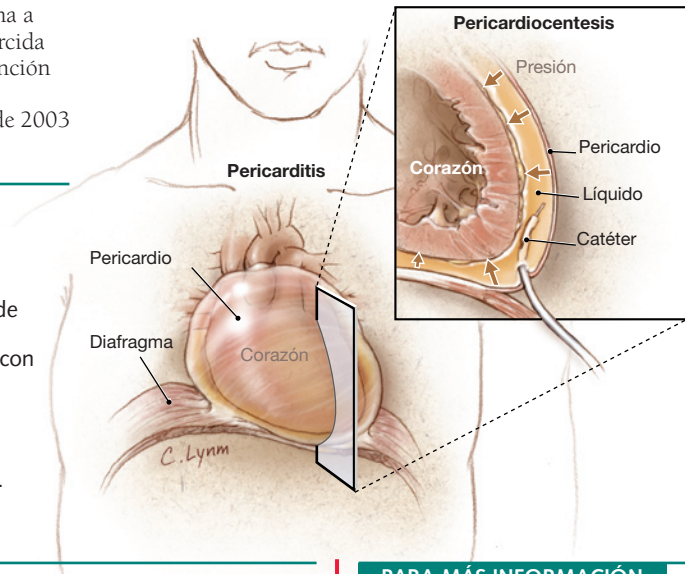

## PARA MÁS INFORMACIÓN

- American Heart Association  
Tel.: 800/242-8721.  
[www.americanheart.org](http://www.americanheart.org)
- National Heart, Lung, and Blood Institute  
Tel.: 301/592-8573.  
[www.nhlbi.nih.gov](http://www.nhlbi.nih.gov)

## PARA SU PROPIA INFORMACIÓN

Para localizar esta "Página de *JAMA* para el Paciente" u otras previas, acceda al índice de la "Página para el Paciente" en la web de *JAMA* ([www.jama.com](http://www.jama.com)). Las "Páginas de *JAMA* para el Paciente" están disponibles en inglés y en español.

Fuentes: American Heart Association y National Heart, Lung, and Blood Institute.

Redactora: Janet Torpy, MD

Diseñador: Cassio Lynn, MA

Editor: Richard M. Glass, MD

La "Página de *JAMA* para el Paciente" es un servicio público de la revista *JAMA*. La información y recomendaciones que aparecen en esta página son adecuadas en la mayoría de los casos, pero no constituyen el sustituto de un diagnóstico médico. Para una información más específica sobre su caso particular, la revista *JAMA* le sugiere que consulte con su médico. Los médicos y otros profesionales de asistencia sanitaria pueden reproducir esta página sin fines comerciales y facilitarla a los pacientes. Cualquier otro tipo de reproducción debe someterse a la aprobación de la AMA. Para adquirir separatas, pueden ponerse en contacto con el teléfono +718/946-7424.

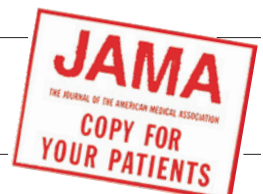

Supplement: pdfpat030503.pdf [file pdfpat030503.pdf]
